# Supplementary material
Source: ML conference proceedings conference paper supplement (https://openreview.net/forum?id=wliRa7kxAB)
Supplement: supplementary_material [file attachment]

# Appendix

## Synthesis of Interactive and Expansive Apartment Environments

### 001 A. Discussion

002 We provide a critical analysis of the current lim-  
003 itations of our framework and discuss the broader  
004 societal implications of our work below.

#### 005 A.1. Limitation

006 Despite the demonstrated efficacy of our pro-  
007 posed method in generating functionally viable and  
008 apartment-scale environments, several limitations  
009 remain to be addressed.

010 **Inference Latency.** A primary constraint is the  
011 computational cost associated with the multi-stage  
012 pipeline. While the LLM-guided floor plan genera-  
013 tion is relatively efficient, the core diffusion-based  
014 furniture population relies on iterative denoising  
015 steps. Coupled with the gradient calculations re-  
016 quired for our novel constraints, the inference time  
017 for a full apartment scale is considerable. This cur-  
018 rently precludes the system from real-time genera-  
019 tion applications.

020 **Heuristic Approximation of Articulation.**  
021 Our Articulated Object Collision Constraint relies  
022 on a heuristic expansion of bounding boxes to  
023 approximate the kinematic workspace of objects.  
024 While robust for standard furniture morphologies  
025 found in GAPartNet, this axis-aligned expansion  
026 simplifies the complex, potentially non-linear tra-  
027 jectories of certain articulated parts. Consequently,  
028 for highly complex mechanisms or multi-jointed  
029 objects, the collision avoidance might be overly  
030 conservative or, in rare cases, insufficient.

031 **Dataset Bias and Generalization.** The stylistic  
032 and semantic diversity of our generated scenes is  
033 inherently bounded by the underlying training data,  
034 specifically 3D-FRONT and GAPartNet. While  
035 these datasets are extensive, they may not fully en-  
036 compass the architectural styles of different cul-  
037 tures or historical periods. As with all learning-  
038 based generative models, the system may exhibit  
039 biases present in the dataset, potentially favoring

modern, Western-style interior layouts over others. 040

#### A.2. Social Impact 041

042 The primary societal contribution of this work  
043 lies in its potential to accelerate the development  
044 of embodied AI and service robotics. By automat-  
045 ing the synthesis of large-scale, functionally sound  
046 training environments, our proposed method sig-  
047 nificantly reduces the reliance on costly and labor-  
048 intensive real-world data collection. This democra-  
049 tization of high-quality simulation data can foster  
050 innovation in domestic robotics, potentially leading  
051 to deploying intelligent agents capable of assisting  
052 the elderly or individuals with disabilities in their  
053 daily lives.

054 From an environmental perspective, while the  
055 training of large diffusion models incurs a carbon  
056 footprint, the ability to train robots in simulation  
057 (Sim-to-Real) drastically reduces the energy con-  
058 sumption, material waste, and physical risks as-  
059 sociated with trial-and-error learning in the phys-  
060 ical world. Regarding ethical considerations, unlike  
061 generative models for faces or media, the genera-  
062 tion of indoor scene layouts carries a relatively low  
063 risk of malicious misuse. However, we advocate  
064 for continued awareness regarding the cultural bi-  
065 ases embedded in synthetic datasets to ensure the  
066 inclusivity of future AI technologies.

#### B. Preliminaries 067

068 Our generative framework is built upon Denois-  
069 ing Diffusion Probabilistic Models (DDPMs) [3].  
070 DDPMs are a class of latent variable models de-  
071 signed to learn a data distribution  $p(\mathbf{x})$  by revers-  
072 ing a gradual noising process. In this section,  
073 we briefly review the mathematical formulation of  
074 DDPMs, including the forward diffusion process,  
075 the reverse denoising process, and the training ob-  
076 jective.

## B.1. Denoising Diffusion Probabilistic Models

**Forward Diffusion Process.** The forward process, also known as the diffusion process, is a fixed Markov chain that gradually adds Gaussian noise to the data  $\mathbf{x}_0 \sim q(\mathbf{x}_0)$  over a sequence of timesteps  $t = 1, \dots, T$ . The transition probability at each step is defined as:

$$q(\mathbf{x}_t | \mathbf{x}_{t-1}) = \mathcal{N}(\mathbf{x}_t; \sqrt{1 - \beta_t} \mathbf{x}_{t-1}, \beta_t \mathbf{I}), \quad (1)$$

where  $\{\beta_t \in (0, 1)\}_{t=1}^T$  is a pre-defined variance schedule. As  $T \rightarrow \infty$ , the data  $\mathbf{x}_T$  approaches an isotropic Gaussian distribution  $\mathcal{N}(\mathbf{0}, \mathbf{I})$ . A key property of this process is that we can sample  $\mathbf{x}_t$  at any arbitrary timestep  $t$  directly from  $\mathbf{x}_0$  in closed form:

$$q(\mathbf{x}_t | \mathbf{x}_0) = \mathcal{N}(\mathbf{x}_t; \sqrt{\bar{\alpha}_t} \mathbf{x}_0, (1 - \bar{\alpha}_t) \mathbf{I}), \quad (2)$$

where  $\alpha_t = 1 - \beta_t$  and  $\bar{\alpha}_t = \prod_{s=1}^t \alpha_s$ . This allows us to express  $\mathbf{x}_t$  as a linear combination of the original data and noise:

$$\mathbf{x}_t = \sqrt{\bar{\alpha}_t} \mathbf{x}_0 + \sqrt{1 - \bar{\alpha}_t} \boldsymbol{\epsilon}, \quad \boldsymbol{\epsilon} \sim \mathcal{N}(\mathbf{0}, \mathbf{I}). \quad (3)$$

**Reverse Denoising Process.** The goal of the generative model is to reverse this process, sampling from  $q(\mathbf{x}_{t-1} | \mathbf{x}_t)$  to reconstruct the data. Since the exact posterior is intractable, we approximate it using a learnable Markov chain with parameterized Gaussian transitions:

$$p_\theta(\mathbf{x}_{t-1} | \mathbf{x}_t) = \mathcal{N}(\mathbf{x}_{t-1}; \boldsymbol{\mu}_\theta(\mathbf{x}_t, t), \boldsymbol{\Sigma}_\theta(\mathbf{x}_t, t)), \quad (4)$$

starting from  $\mathbf{x}_T \sim \mathcal{N}(\mathbf{0}, \mathbf{I})$ . The mean  $\boldsymbol{\mu}_\theta$  and covariance  $\boldsymbol{\Sigma}_\theta$  are predicted by neural networks. Following [3], we set  $\boldsymbol{\Sigma}_\theta(\mathbf{x}_t, t) = \sigma_t^2 \mathbf{I}$ , where  $\sigma_t^2$  is set to  $\beta_t$  or  $\beta_t = \frac{1 - \bar{\alpha}_{t-1}}{1 - \bar{\alpha}_t} \beta_t$ . The mean is parameterized to predict the noise  $\boldsymbol{\epsilon}$  added to  $\mathbf{x}_0$ :

$$\boldsymbol{\mu}_\theta(\mathbf{x}_t, t) = \frac{1}{\sqrt{\alpha_t}} \left( \mathbf{x}_t - \frac{\beta_t}{\sqrt{1 - \bar{\alpha}_t}} \boldsymbol{\epsilon}_\theta(\mathbf{x}_t, t) \right). \quad (5)$$

**Optimization Objective.** The model is trained by optimizing the variational lower bound on the negative log-likelihood. Ho et al. [3] demonstrated that a simplified objective yields better sample

quality. This simplified loss calculates the mean squared error between the true noise  $\boldsymbol{\epsilon}$  and the predicted noise  $\boldsymbol{\epsilon}_\theta$ :

$$\mathcal{L}_{\text{simple}} = \mathbb{E}_{t, \mathbf{x}_0, \boldsymbol{\epsilon}} [\|\boldsymbol{\epsilon} - \boldsymbol{\epsilon}_\theta(\mathbf{x}_t, t)\|^2], \quad (6)$$

where  $t$  is uniformly sampled from  $\{1, \dots, T\}$ . In our framework, we adapt this backbone to generate 3D scene layouts by conditioning the denoiser on floor plan constraints.

## C. Implementation Details

**Experimental Setting.** We evaluate our method on the 3D-FRONT dataset, employing the official train/test splits to ensure consistency with prior work. For articulation-aware generation, we augment the object assets using the GPartNet dataset, which provides part-level annotations. To verify the robustness of our method, all baselines are re-trained on this identical data subset. We generate 1,000 scenes for each experimental condition to compute reliable metrics.

**Evaluation Metrics.** To quantitatively evaluate the quality, diversity, and semantic coherence of our generated scenes, we employ a comprehensive suite of metrics. *Standard Perceptual & Semantic Metrics:*

- **Fréchet Inception Distance (FID) [2]:** Measures the distributional distance between deep features of generated ( $\mu_g, \Sigma_g$ ) and real ( $\mu_r, \Sigma_r$ ) scene renderings:

$$\text{FID} = \|\mu_r - \mu_g\|^2 + \text{Tr}(\Sigma_r + \Sigma_g - 2(\Sigma_r \Sigma_g)^{1/2}) \quad (7)$$

- **Kernel Inception Distance (KID) [1]:** An unbiased estimator of the Maximum Mean Discrepancy (MMD) between feature representations, suitable for smaller sample sizes:

$$\begin{aligned} \text{KID} &= \text{MMD}^2(P_r, P_g) \\ &= \mathbb{E}[k(x, x')] + \mathbb{E}[k(y, y')] - 2\mathbb{E}[k(x, y)] \end{aligned} \quad (8)$$

- **Scene-Class Alignment (SCA) [4]:** Evaluates semantic consistency by calculating the classification accuracy of a pre-trained scene classifier  $C$  on generated layouts  $x_{\text{gen}}$ :

$$\text{SCA} = \mathbb{E}_{x_{\text{gen}}} [\mathbb{I}(C(x_{\text{gen}}) = y_{\text{label}})] \quad (9)$$

- 153 • **Category KL divergence (CKL) [4]:** Measures  
154 the divergence between the object category dis-  
155 tribution of the generated set ( $P_g$ ) and the ground  
156 truth ( $P_r$ ):

$$\text{CKL} = D_{KL}(P_g||P_r) = \sum_i P_g(i) \log \frac{P_g(i)}{P_r(i)} \quad (10)$$

157  
158 *Proposed Controllability Metrics (Ours):*

- 159 • **LLM-Guided Layout Metric:** Evaluates the  
160 structural and semantic fidelity of the generated  
161 floor plan graph against the ground truth by as-  
162 sessing node matching, edge connectivity, and  
163 constraint satisfaction.  
164 • **Object Quantity Control Metric:** Defines the  
165 success rate of generating scenes that contain the  
166 exact target number of objects specified by the  
167 user.  
168 • **Articulation Collision Ratio:** Measures the per-  
169 centage of articulated objects (e.g., cabinets) that  
170 are functionally obstructed by other objects when  
171 in their open/extended state.  
172 • **Walkable Area Controllability:** Calculates the  
173 success rate of generating scenes where the ra-  
174 tio of unobstructed walkable floor area meets or  
175 exceeds a specified threshold.

### 176 C.1. Compare Model Settings

177 We benchmark against three state-of-the-art  
178 baselines:

- 179 • **ATISS:** An autoregressive transformer model  
180 that places objects sequentially. We use the of-  
181 ficial implementation, retraining it on our dataset  
182 split for fair comparison.  
183 • **DiffuScene:** A diffusion-based model that gen-  
184 erates scene layouts in parallel. This represents  
185 the current state-of-the-art in unconditional lay-  
186 out generation.  
187 • **PhyScene:** A recent physics-aware generative  
188 model. We compare against PhyScene to high-  
189 light the advantages of our specific articulated  
190 object constraints.

191 All models receive the same floor plan input during  
192 the conditional generation tasks.

### C.2. Training Details

The model is trained using the Adam optimizer  
with a learning rate of  $2 \times 10^{-4}$  and weight decay  
of 0.0. We employ a step learning rate schedule  
with a step size of 20,000 and a decay factor of 0.5.  
Training runs for 130,000 epochs with a batch size  
of 128. The gradient norm is clipped at 10. Table 1  
summarizes the complete hyperparameter configu-  
ration.

Table 1. Detailed hyperparameter settings for training the diffusion model.

| Configuration                | Value              |
|------------------------------|--------------------|
| Optimizer                    | Adam               |
| Base Learning Rate           | $2 \times 10^{-4}$ |
| Weight Decay                 | 0.0                |
| Batch Size                   | 128                |
| Max Gradient Norm            | 10                 |
| Learning Rate Schedule       | Step Decay         |
| LR Step Size                 | 20,000             |
| LR Decay Factor ( $\gamma$ ) | 0.5                |
| Total Epochs                 | 130,000            |

### C.3. Computing Resource Configuration

All model training and evaluation were con-  
ducted on a computing node equipped with a single  
**NVIDIA 3090 GPU (24GB VRAM)** and an  
**Intel Core i9-12900K**. Under this configuration,  
training the core diffusion model takes approxi-  
mately 1500 hours. During inference, generating a  
complete apartment-scale scene (3 rooms) with full  
constraint guidance takes approximately 300 sec-  
onds per scene.

## D. Additional Experiments

### D.1. LLM Controllability

To rigorously evaluate the fidelity of our LLM-  
based parameter space guidance, we designed a  
comprehensive benchmark consisting of 20 distinct  
natural language prompts.

**Overall Performance.** We define a generation  
as successful only if the final layout strictly adheres

220 to all constraints specified in the prompt, as shown  
221 in Table 2.

Table 2. Summary of LLM Controllability Experiments.

| Metric           | Value |
|------------------|-------|
| Total Test Cases | 20    |
| Average Score    | 96.5% |

222 **Component Analysis.** To understand the spe-  
223 cific challenges in layout control, we decompose  
224 the performance into three sub-metrics. The score  
225 is composed of weights in the Table 3.

- 226 • **Room Presence:** Existence of required room  
227 types.
- 228 • **Adjacency:** Correct connectivity between  
229 rooms.
- 230 • **Constraints:** Geometric or functional require-  
231 ments.

Table 3. Weights indicate the relative importance as-  
signed to each component in the overall score.

| Component     | Avg. Score | Weight |
|---------------|------------|--------|
| Room Presence | 98.9%      | 50%    |
| Adjacency     | 92.3%      | 30%    |
| Constraints   | 95.4%      | 20%    |

232 **Detailed Test Results** We provide a granular  
233 breakdown of each test case in Table 4. In these  
234 cases, the system maintains high scores on connec-  
235 tivity and functional constraints, ensuring the gen-  
236 erated layouts remain usable.

## 237 E. Render Results

238 We present an extensive qualitative evaluation of  
239 the 3D indoor layouts generated by our proposed  
240 method. While quantitative metrics provide numer-  
241 ical evidence of our model’s performance, visual  
242 inspection is equally crucial for assessing the per-  
243 ceptual quality, spatial coherence, and practical us-  
244 ability of the synthesized scenes. To this end, we  
245 provide a comprehensive gallery of results across  
246 a diverse range of scene categories, demonstrating

the robustness of our approach in handling complex  
room geometries.

To guarantee the highest visual fidelity, all vi-  
sualizations were produced using the **Blender** cre-  
ation suite, leveraging its advanced **Cycles** ren-  
dering engine. Cycles is a production-grade,  
physically-based path tracer that excels at simu-  
lating the intricate interactions of light transport.  
Unlike real-time rasterization engines, Cycles cal-  
culates global illumination, multi-bounce indirect  
lighting, and accurate soft shadows, which are  
essential for verifying that objects are properly  
grounded and not floating. Furthermore, we uti-  
lized high-resolution Physically Based Rendering  
textures and materials to enhance the realism of the  
furniture, allowing for a rigorous assessment of the  
layout’s aesthetic quality.

The rendering pipeline imposes significant com-  
putational demands, particularly when processing  
scenes with high-poly assets and complex lighting  
setups. Consequently, all rendering tasks were ex-  
ecuted on a dedicated workstation equipped with  
an **Intel Core i3-14100F CPU** and an **NVIDIA  
RTX 5090 GPU**. The massive 32GB VRAM of  
the RTX 5090 proved instrumental in loading large-  
scale scene data and high-resolution textures with-  
out memory bottlenecks, while the CPU efficiently  
managed scene graph traversal and asset loading.

These visualizations highlight the model’s capa-  
bility to handle complex spatial arrangements nat-  
urally. We observe that the generated objects are  
physically plausible, exhibiting proper orientations  
and avoiding inter-object collisions, as shown in  
Figure 1 and Figure 2. Collectively, these quali-  
tative results validate that our method not only ad-  
heres to rigid geometric constraints but also pro-  
duces aesthetically pleasing and functionally real-  
istic environments suitable for practical design ap-  
plications.

Table 4. Complete Test Results for LLM Controllability. This table details the performance of 20 distinct test prompts.

| Test ID                    | Score  | Time(s) | Room Presence | Adjacency | Constraints |
|----------------------------|--------|---------|---------------|-----------|-------------|
| two_bedroom_apt_01         | 100.0% | 262.2   | 100%          | 100%      | 100%        |
| open_plan_loft_01          | 100.0% | 274.7   | 100%          | 100%      | 100%        |
| family_home_01             | 100.0% | 276.7   | 100%          | 100%      | 100%        |
| master_suite_home_01       | 100.0% | 265.3   | 100%          | 100%      | 100%        |
| four_bedroom_house_01      | 100.0% | 270.8   | 100%          | 100%      | 100%        |
| guest_suite_home_01        | 100.0% | 282.2   | 100%          | 100%      | 100%        |
| dual_master_suite_01       | 100.0% | 269.5   | 100%          | 100%      | 100%        |
| balcony_apartment_01       | 100.0% | 285.2   | 100%          | 100%      | 100%        |
| multigenerational_home_01  | 100.0% | 289.7   | 100%          | 100%      | 100%        |
| basic_studio_01            | 100.0% | 259.0   | 100%          | 100%      | 100%        |
| one_bedroom_apt_01         | 100.0% | 270.0   | 100%          | 100%      | 100%        |
| compact_efficiency_01      | 100.0% | 269.7   | 100%          | 100%      | 100%        |
| student_apartment_01       | 100.0% | 266.0   | 100%          | 100%      | 100%        |
| single_floor_accessible_01 | 100.0% | 262.5   | 100%          | 100%      | 100%        |
| entertainment_home_01      | 95.8%  | 274.9   | 100%          | 100%      | 79.2%       |
| work_from_home_01          | 90.0%  | 263.0   | 80.0%         | 100%      | 100%        |
| luxury_penthouse_01        | 88.8%  | 270.8   | 87.5%         | 100%      | 75.0%       |
| three_bed_townhouse_01     | 85.0%  | 268.3   | 100%          | 50%       | 100%        |
| separated_zones_01         | 85.0%  | 285.7   | 100%          | 50.0%     | 100%        |
| home_office_layout_01      | 62.5%  | 267.8   | 25.0%         | 100%      | 100%        |

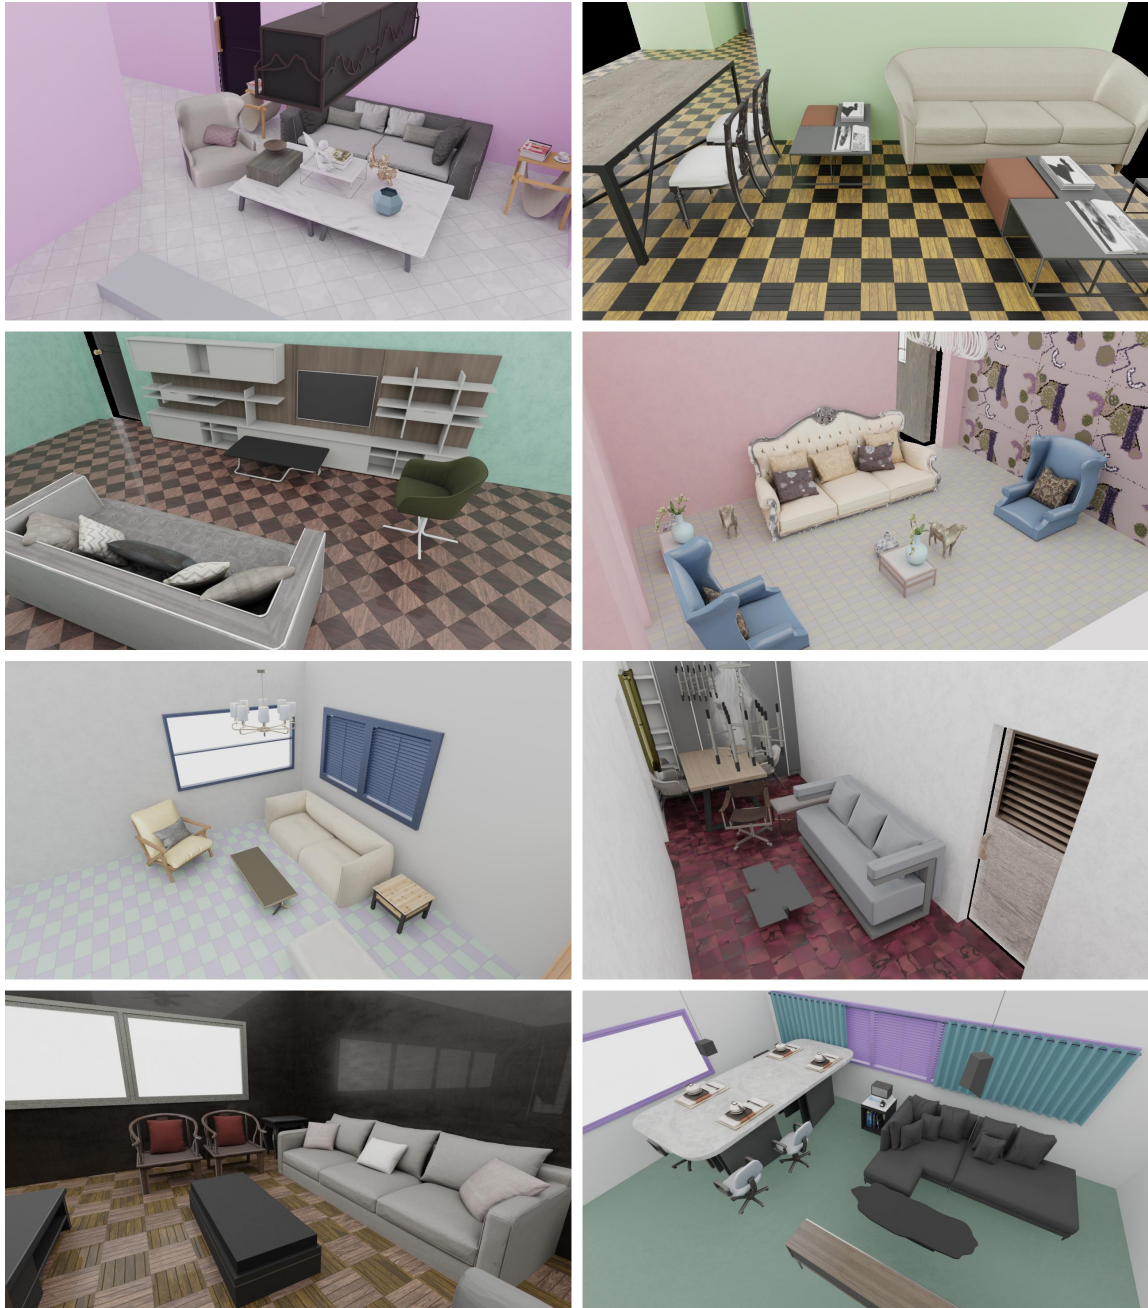

Figure 1. **Generated 3D Layouts.** Representative visualization of scenes generated by our proposed framework. (Part 1).

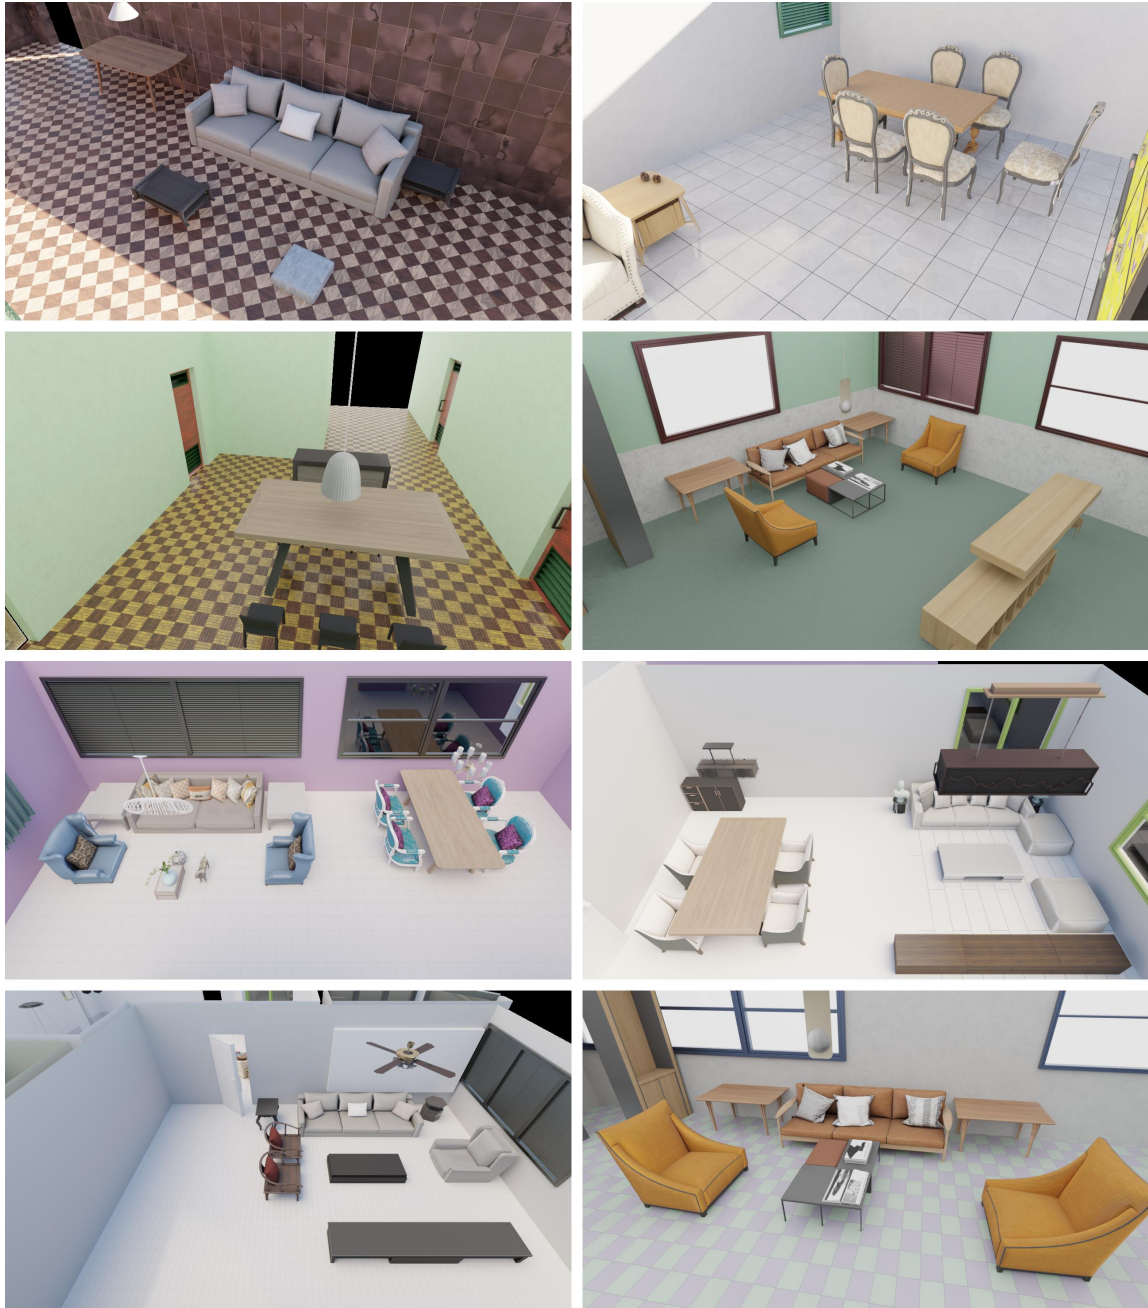

Figure 2. **Generated 3D Layouts.** Representative visualization of scenes generated by our proposed framework. (Part 2).

286 **References**

- 287 [1] Mikołaj Bińkowski, Danica J. Sutherland, Michael  
288 Arbel, and Arthur Gretton. Demystifying mmd gans,  
289 2021. [2](#)
- 290 [2] Martin Heusel, Hubert Ramsauer, Thomas Un-  
291 terthiner, Bernhard Nessler, and Sepp Hochreiter.  
292 Gans trained by a two time-scale update rule con-  
293 verge to a local nash equilibrium, 2018. [2](#)
- 294 [3] Jonathan Ho, Ajay Jain, and Pieter Abbeel. Denois-  
295 ing diffusion probabilistic models, 2020. [1](#), [2](#)
- 296 [4] Jiapeng Tang, Yinyu Nie, Lev Markhasin, Angela  
297 Dai, Justus Thies, and Matthias Nießner. Diffuscene:  
298 Denoising diffusion models for generative indoor  
299 scene synthesis, 2024. [2](#), [3](#)
